# Supplementary material for: Influence of soil management for soybean production under microbial diversity in amazon soils
Source: Frontiers journal article supplement (doi:10.3389/fenvs.2022.1024610), 2022-11-18
Supplement: Image_1.pdf [file Image_1.pdf]

## *Supplementary Material*

### 1. Supplementary Figures

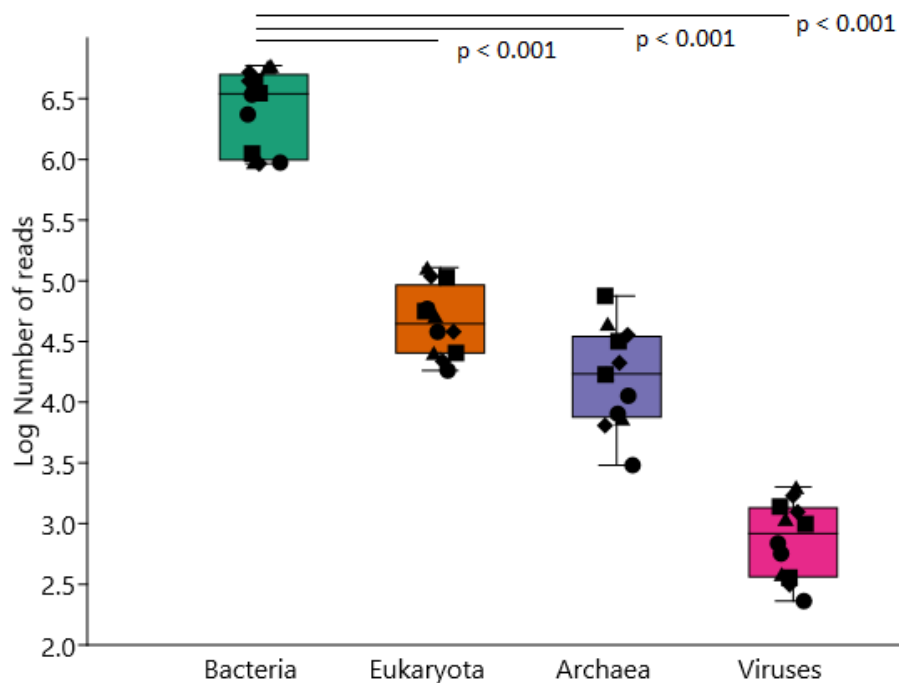

**Supplementary Figure 1.** Distribution of readings used to identify the different microbial domains. The circles in black represent the forest site, square in black pasture, triangle in black 2-year crop and rhombus in black 14-year crop.

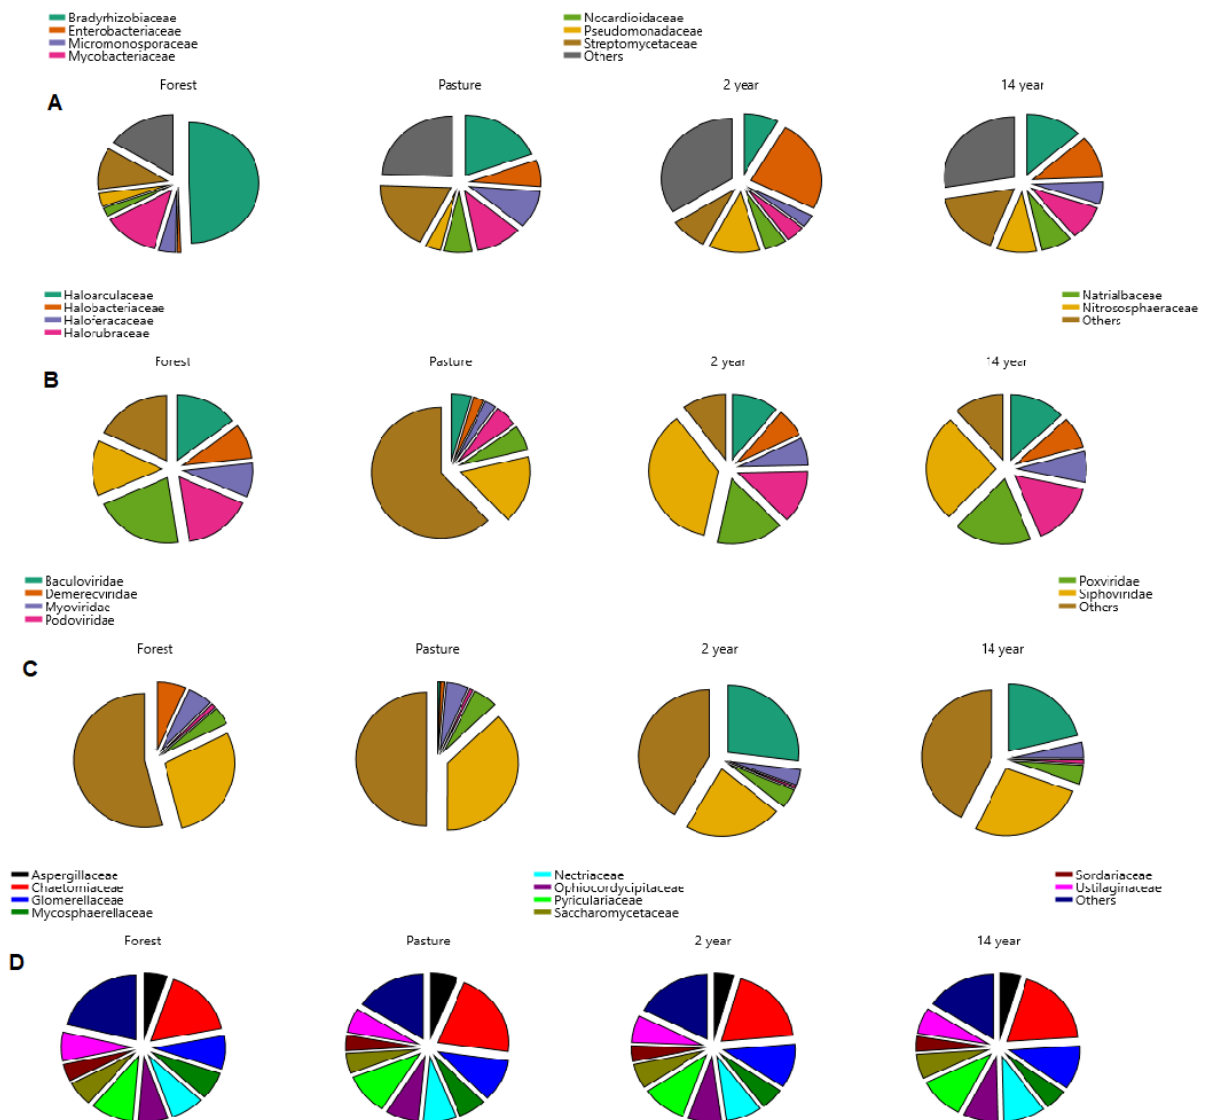

**Supplementary Figure 2.** Relative abundance segundo a classificação Family A: bacteria, B: archaea, C: virus and D: fungi.

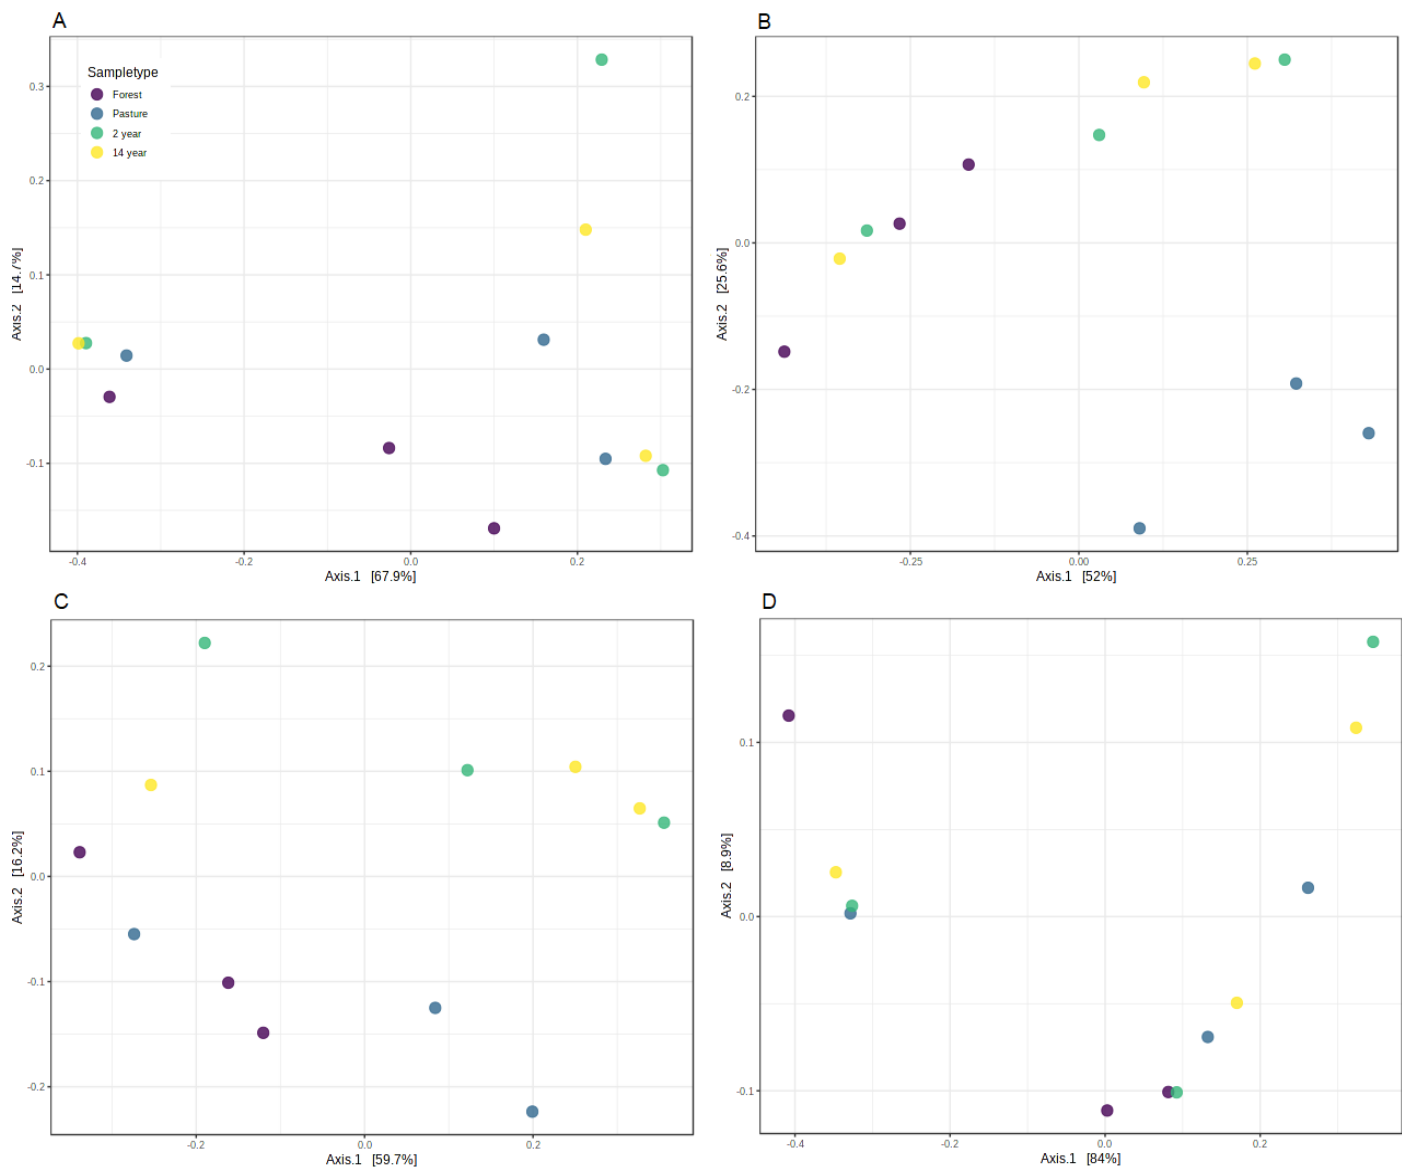

**Supplementary Figure 3.** Principal coordinates for the analysis of the beta diversity. A: bacteria; B: archaea; C: virus and D: fungi. Clusters of replicas were evidenced for archaea and viruses, in contrast to bacteria and fungi.
